# Supplementary material for: Moving towards Routine Evaluation of Quality of Inpatient Pediatric Care in Kenya
Source: PubMed Central journal article supplement (PMC4378956; doi:10.1371/journal.pone.0117048), 2015-03-30
Supplement: pone.0117048.s002.pdf [file pone.0117048.s002.pdf]

| Hospital code                        | 10 | 11 | 12 | 13 | 14 | 15 | 16 | 17 | 18 | 19 | 20 | 21 | 22 | 23 | 24 | 25 | 26 | 27 | 28 | 29 | 30 | 31 | Total availability across hospitals |    |
|--------------------------------------|----|----|----|----|----|----|----|----|----|----|----|----|----|----|----|----|----|----|----|----|----|----|-------------------------------------|----|
| <b>Essential equipment</b>           |    |    |    |    |    |    |    |    |    |    |    |    |    |    |    |    |    |    |    |    |    |    |                                     |    |
| Resuscitation couch                  | 0  | 1  | 1  | 1  | 1  | 1  | 1  | 1  | 1  | 1  | 1  | 1  | 1  | 1  | 1  | 1  | 1  | 0  | 1  | 1  | 1  | 0  | 19                                  |    |
| Bag Valve Mask                       | 1  | 0  | 1  | 0  | 1  | 1  | 1  | 1  | 1  | 1  | 1  | 1  | 1  | 1  | 1  | 1  | 1  | 1  | 1  | 1  | 1  | 1  | 1                                   | 20 |
| Resuscitation tray                   | 1  | 1  | 1  | 0  | 0  | 1  | 0  | 1  | 1  | 1  | 1  | 1  | 1  | 1  | 1  | 0  | 1  | 1  | 1  | 1  | 1  | 1  | 1                                   | 18 |
| scales_standing                      | 1  | 0  | 1  | 0  | 1  | 1  | 1  | 1  | 1  | 1  | 1  | 1  | 1  | 1  | 1  | 1  | 0  | 1  | 0  | 1  | 1  | 1  | 0                                   | 17 |
| scales basin                         | 1  | 1  | 1  | 1  | 1  | 1  | 0  | 1  | 1  | 1  | 0  | 1  | 1  | 1  | 1  | 0  | 1  | 1  | 1  | 1  | 1  | 1  | 0                                   | 18 |
| Nebulizer/spacer                     | 1  | 1  | 1  | 0  | 0  | 1  | 1  | 1  | 1  | 1  | 1  | 1  | 1  | 1  | 1  | 0  | 1  | 1  | 1  | 1  | 1  | 1  | 0                                   | 18 |
| Oxygen Flow meter                    | 1  | 1  | 1  | 0  | 0  | 0  | 1  | 1  | 1  | 1  | 1  | 1  | 1  | 0  | 1  | 1  | 1  | 1  | 1  | 0  | 0  | 1  | 0                                   | 15 |
| Sphygmomaneter                       | 0  | 1  | 1  | 0  | 0  | 1  | 0  | 1  | 1  | 1  | 0  | 0  | 1  | 0  | 1  | 0  | 0  | 0  | 1  | 1  | 1  | 0  | 1                                   | 12 |
| Clinical torch                       | 1  | 0  | 1  | 0  | 0  | 0  | 0  | 0  | 0  | 1  | 0  | 0  | 0  | 0  | 1  | 0  | 1  | 1  | 0  | 1  | 0  | 1  | 0                                   | 8  |
| otoscope                             | 0  | 0  | 0  | 0  | 0  | 1  | 0  | 0  | 0  | 0  | 0  | 0  | 0  | 0  | 0  | 0  | 0  | 0  | 0  | 1  | 0  | 0  | 1                                   | 3  |
| Chest tube                           | 0  | 0  | 0  | 0  | 0  | 0  | 0  | 0  | 0  | 0  | 0  | 0  | 0  | 0  | 0  | 0  | 0  | 0  | 1  | 0  | 0  | 0  | 0                                   | 1  |
| <b>Resources for supportive care</b> |    |    |    |    |    |    |    |    |    |    |    |    |    |    |    |    |    |    |    |    |    |    |                                     |    |
| Oxygen                               | 1  | 1  | 1  | 1  | 1  | 1  | 1  | 1  | 1  | 1  | 1  | 1  | 1  | 1  | 1  | 1  | 1  | 1  | 1  | 1  | 1  | 1  | 1                                   | 22 |
| Normal saline                        | 1  | 1  | 1  | 1  | 0  | 1  | 1  | 1  | 1  | 1  | 1  | 1  | 1  | 1  | 1  | 1  | 1  | 1  | 1  | 1  | 1  | 1  | 1                                   | 21 |
| Paediatric cannulae                  | 1  | 1  | 1  | 1  | 1  | 0  | 1  | 1  | 1  | 1  | 1  | 1  | 1  | 0  | 1  | 1  | 1  | 1  | 1  | 1  | 1  | 1  | 1                                   | 20 |
| IV giving sets, needles, syringe     | 1  | 1  | 1  | 1  | 1  | 0  | 1  | 1  | 1  | 1  | 1  | 1  | 1  | 1  | 1  | 1  | 1  | 1  | 1  | 1  | 1  | 1  | 1                                   | 21 |
| Emergency room/area                  | 1  | 1  | 1  | 1  | 1  | 1  | 1  | 1  | 1  | 1  | 1  | 1  | 1  | 1  | 1  | 1  | 1  | 0  | 1  | 1  | 1  | 1  | 0                                   | 20 |
| Bag Valve Mask                       | 1  | 0  | 1  | 1  | 1  | 1  | 1  | 1  | 1  | 1  | 1  | 1  | 1  | 1  | 1  | 0  | 1  | 1  | 1  | 0  | 1  | 1  | 1                                   | 19 |
| Working Bag Valve Mask               | 1  | 0  | 1  | 1  | 1  | 1  | 1  | 1  | 1  | 1  | 1  | 1  | 1  | 1  | 1  | 0  | 1  | 1  | 1  | 1  | 0  | 1  | 1                                   | 19 |
| Working suction equipment            | 1  | 0  | 1  | 0  | 1  | 1  | 1  | 1  | 1  | 1  | 1  | 1  | 0  | 1  | 0  | 1  | 1  | 1  | 1  | 1  | 1  | 1  | 0                                   | 17 |
| Nasal gastric tube                   | 1  | 1  | 1  | 0  | 1  | 1  | 0  | 1  | 1  | 1  | 1  | 1  | 0  | 1  | 0  | 1  | 0  | 1  | 1  | 1  | 1  | 1  | 1                                   | 17 |
| Heat source                          | 0  | 1  | 0  | 1  | 0  | 0  | 0  | 1  | 1  | 0  | 1  | 1  | 1  | 0  | 1  | 1  | 1  | 0  | 1  | 0  | 0  | 0  | 0                                   | 11 |
| Resuscitation equipment up to date   | 1  | 1  | 1  | 0  | 0  | 0  | 0  | 1  | 1  | 1  | 0  | 1  | 1  | 0  | 1  | 0  | 1  | 1  | 1  | 1  | 1  | 0  | 1                                   | 13 |
| Paediatric burette                   | 0  | 0  | 1  | 0  | 0  | 0  | 0  | 0  | 1  | 0  | 1  | 0  | 0  | 0  | 1  | 0  | 1  | 1  | 1  | 0  | 1  | 0  | 0                                   | 8  |
| <b>Antibiotics</b>                   |    |    |    |    |    |    |    |    |    |    |    |    |    |    |    |    |    |    |    |    |    |    |                                     |    |
| Ampicillin injection                 | 0  | 0  | 0  | 1  | 0  | 0  | 0  | 0  | 0  | 0  | 0  | 0  | 0  | 0  | 0  | 0  | 0  | 0  | 0  | 0  | 0  | 0  | 0                                   | 1  |
| Amoxicillin syrup                    | 1  | 1  | 1  | 1  | 1  | 1  | 1  | 1  | 0  | 1  | 1  | 1  | 1  | 1  | 1  | 1  | 0  | 1  | 1  | 1  | 1  | 1  | 1                                   | 20 |
| Amoxicillin-clavulanic               | 0  | 0  | 0  | 1  | 0  | 0  | 1  | 0  | 0  | 0  | 0  | 1  | 0  | 0  | 1  | 1  | 0  | 0  | 1  | 0  | 0  | 1  | 7                                   |    |
| Crystalline penicillin               | 1  | 1  | 1  | 1  | 1  | 1  | 1  | 1  | 1  | 1  | 1  | 1  | 1  | 1  | 1  | 1  | 1  | 1  | 1  | 1  | 1  | 1  | 1                                   | 22 |
| (Flu)Cloxacillin                     | 1  | 0  | 1  | 0  | 0  | 0  | 1  | 1  | 1  | 1  | 0  | 0  | 0  | 1  | 1  | 1  | 1  | 1  | 1  | 1  | 0  | 1  | 1                                   | 14 |
| Ceftriaxone                          | 1  | 0  | 0  | 1  | 1  | 0  | 1  | 1  | 0  | 1  | 0  | 1  | 0  | 0  | 1  | 0  | 1  | 1  | 1  | 1  | 1  | 1  | 1                                   | 15 |
| Chloramphenical                      | 1  | 1  | 0  | 1  | 0  | 0  | 1  | 1  | 0  | 1  | 1  | 1  | 0  | 1  | 1  | 1  | 1  | 1  | 1  | 1  | 0  | 0  | 1                                   | 15 |
| Ciprofloxacin                        | 1  | 0  | 0  | 1  | 0  | 0  | 1  | 0  | 1  | 0  | 0  | 0  | 0  | 0  | 1  | 1  | 1  | 1  | 1  | 0  | 0  | 1  | 7                                   |    |
| Gentamicin                           | 1  | 1  | 0  | 1  | 1  | 0  | 1  | 1  | 1  | 1  | 1  | 1  | 0  | 1  | 1  | 1  | 1  | 1  | 1  | 1  | 1  | 1  | 1                                   | 18 |
| Cotrimoxazole                        | 1  | 1  | 1  | 1  | 1  | 1  | 1  | 1  | 1  | 1  | 1  | 1  | 1  | 1  | 1  | 1  | 1  | 1  | 1  | 1  | 1  | 1  | 1                                   | 22 |
| <b>IV fluids and drugs</b>           |    |    |    |    |    |    |    |    |    |    |    |    |    |    |    |    |    |    |    |    |    |    |                                     |    |
| 10% dextrose                         | 1  | 1  | 1  | 1  | 1  | 1  | 1  | 1  | 1  | 1  | 1  | 1  | 1  | 1  | 1  | 1  | 1  | 1  | 1  | 1  | 1  | 1  | 1                                   | 22 |
| 5% dextrose                          | 1  | 1  | 1  | 1  | 1  | 1  | 1  | 1  | 0  | 1  | 1  | 1  | 0  | 1  | 1  | 1  | 1  | 1  | 1  | 1  | 1  | 1  | 1                                   | 20 |
| Normal saline                        | 1  | 1  | 1  | 1  | 1  | 1  | 1  | 1  | 1  | 1  | 0  | 1  | 1  | 1  | 1  | 1  | 1  | 1  | 1  | 1  | 1  | 1  | 1                                   | 21 |
| Ringers lactate                      | 1  | 1  | 1  | 1  | 1  | 1  | 1  | 1  | 0  | 1  | 1  | 0  | 1  | 1  | 1  | 1  | 1  | 1  | 1  | 1  | 1  | 1  | 0                                   | 19 |
| ORS                                  | 1  | 1  | 1  | 1  | 1  | 1  | 1  | 1  | 1  | 1  | 1  | 1  | 1  | 1  | 1  | 1  | 1  | 1  | 1  | 1  | 1  | 1  | 1                                   | 22 |
| Adrenaline                           | 1  | 1  | 1  | 1  | 1  | 0  | 1  | 1  | 1  | 1  | 0  | 1  | 1  | 1  | 1  | 1  | 1  | 1  | 1  | 1  | 1  | 1  | 1                                   | 20 |
| Digoxin                              | 1  | 1  | 1  | 1  | 1  | 0  | 1  | 1  | 0  | 1  | 0  | 1  | 0  | 1  | 1  | 0  | 0  | 1  | 1  | 1  | 1  | 1  | 0                                   | 15 |
| Hydrocortisone                       | 1  | 1  | 0  | 1  | 1  | 0  | 1  | 1  | 0  | 1  | 1  | 1  | 0  | 1  | 0  | 1  | 1  | 1  | 1  | 1  | 1  | 1  | 1                                   | 17 |
| lasix (Furosemide)                   | 1  | 1  | 1  | 1  | 1  | 1  | 1  | 1  | 1  | 0  | 1  | 1  | 1  | 1  | 1  | 1  | 1  | 1  | 1  | 1  | 1  | 1  | 1                                   | 21 |
| Diapexam                             | 1  | 1  | 1  | 1  | 1  | 1  | 1  | 1  | 1  | 1  | 1  | 1  | 1  | 1  | 1  | 1  | 1  | 1  | 1  | 1  | 1  | 1  | 1                                   | 22 |
| Phenorbabitone                       | 1  | 1  | 0  | 1  | 1  | 0  | 1  | 1  | 0  | 1  | 1  | 0  | 1  | 0  | 1  | 1  | 1  | 1  | 1  | 1  | 1  | 0  | 1                                   | 16 |
| Salbutamol (nebulise/rinhaled)       | 1  | 1  | 0  | 1  | 0  | 0  | 1  | 1  | 1  | 0  | 1  | 0  | 1  | 0  | 1  | 0  | 1  | 1  | 1  | 1  | 1  | 1  | 0                                   | 14 |
| <b>Vitamins, minerals and feeds</b>  |    |    |    |    |    |    |    |    |    |    |    |    |    |    |    |    |    |    |    |    |    |    |                                     |    |
| Zinc                                 | 1  | 1  | 1  | 1  | 1  | 1  | 1  | 1  | 1  | 1  | 1  | 1  | 1  | 1  | 1  | 1  | 1  | 1  | 1  | 1  | 1  | 1  | 1                                   | 22 |
| Vitamin A                            | 1  | 1  | 1  | 1  | 1  | 0  | 1  | 1  | 1  | 1  | 1  | 1  | 1  | 1  | 1  | 1  | 1  | 1  | 1  | 1  | 1  | 1  | 1                                   | 21 |
| Vitamin K                            | 1  | 1  | 0  | 1  | 0  | 0  | 1  | 1  | 1  | 1  | 1  | 0  | 1  | 0  | 1  | 0  | 1  | 1  | 1  | 1  | 1  | 1  | 1                                   | 16 |
| Iron (tabs/syrup)                    | 0  | 1  | 0  | 1  | 1  | 0  | 1  | 1  | 0  | 0  | 1  | 1  | 1  | 1  | 1  | 1  | 0  | 1  | 1  | 1  | 1  | 1  | 1                                   | 14 |
| F75                                  | 1  | 0  | 1  | 1  | 1  | 1  | 1  | 1  | 1  | 1  | 1  | 1  | 1  | 1  | 1  | 1  | 1  | 1  | 1  | 1  | 1  | 1  | 1                                   | 21 |
| F100                                 | 1  | 1  | 1  | 1  | 1  | 1  | 1  | 1  | 1  | 1  | 1  | 1  | 1  | 1  | 1  | 1  | 1  | 1  | 1  | 1  | 1  | 1  | 1                                   | 22 |
| Term formula                         | 0  | 0  | 1  | 1  | 0  | 0  | 1  | 1  | 0  | 0  | 1  | 0  | 0  | 0  | 1  | 1  | 1  | 1  | 1  | 1  | 0  | 1  | 1                                   | 11 |
| Preterm formula                      | 0  | 0  | 0  | 1  | 0  | 0  | 0  | 0  | 0  | 0  | 0  | 1  | 0  | 0  | 0  | 1  | 0  | 1  | 0  | 0  | 1  | 0  | 5                                   |    |
| <b>Guidelines and wall charts</b>    |    |    |    |    |    |    |    |    |    |    |    |    |    |    |    |    |    |    |    |    |    |    |                                     |    |
| Newborn feeding                      | 0  | 0  | 0  | 0  | 0  | 0  | 0  | 0  | 0  | 0  | 1  | 0  | 0  | 0  | 0  | 0  | 1  | 1  | 1  | 0  | 0  | 0  | 0                                   | 4  |
| Newborn resuscitation                | 0  | 0  | 0  | 0  | 1  | 0  | 1  | 0  | 0  | 0  | 0  | 0  | 0  | 1  | 0  | 0  | 1  | 0  | 1  | 0  | 0  | 0  | 0                                   | 5  |
| Infant resuscitation                 | 0  | 0  | 0  | 1  | 1  | 0  | 1  | 0  | 0  | 0  | 0  | 0  | 0  | 0  | 0  | 1  | 0  | 0  | 0  | 0  | 0  | 0  | 0                                   | 5  |
| PMTCT                                | 1  | 0  | 0  | 0  | 1  | 1  | 1  | 0  | 0  | 1  | 1  | 0  | 1  | 0  | 1  | 0  | 1  | 0  | 0  | 1  | 1  | 1  | 0                                   | 12 |
| Dosage guidelines                    | 1  | 0  | 0  | 1  | 0  | 0  | 1  | 0  | 0  | 1  | 1  | 0  | 0  | 0  | 1  | 1  | 1  | 0  | 1  | 0  | 1  | 0  | 0                                   | 10 |
| Pneumonia                            | 0  | 0  | 0  | 0  | 0  | 0  | 0  | 0  | 0  | 1  | 0  | 0  | 0  | 0  | 1  | 1  | 1  | 0  | 1  | 0  | 0  | 0  | 1                                   | 6  |
| Malaria                              | 1  | 1  | 0  | 0  | 0  | 0  | 1  | 0  | 0  | 1  | 0  | 0  | 0  | 0  | 1  | 0  | 1  | 0  | 1  | 0  | 0  | 0  | 1                                   | 8  |
| Diarrhoea/dehydration                | 1  | 1  | 0  | 0  | 0  | 1  | 0  | 0  | 0  | 1  | 0  | 1  | 0  | 0  | 1  | 0  | 1  | 0  | 1  | 1  | 1  | 1  | 1                                   | 11 |
| Basic Paediatric protocols           | 1  | 1  |    |    |    |    |    |    |    |    |    |    |    |    |    |    |    |    |    |    |    |    |                                     |    |
