# Supplementary material for: Moving towards Routine Evaluation of Quality of Inpatient Pediatric Care in Kenya
Source: PubMed Central journal article supplement (PMC4378956; doi:10.1371/journal.pone.0117048), 2015-03-30
Supplement: pone.0117048.s003.pdf [file pone.0117048.s003.pdf]

| Hospital code                                                                   | 10        | 11       | 12        | 13        | 14        | 15       | 16        | 17        | 18       | 19       | 20        | 21       | 22        | 23       | 24      | 25        | 26        | 27       | 28       | 29        | 30        | 31        | All hospitals pooled |                                      |                                                |                                   |  |
|---------------------------------------------------------------------------------|-----------|----------|-----------|-----------|-----------|----------|-----------|-----------|----------|----------|-----------|----------|-----------|----------|---------|-----------|-----------|----------|----------|-----------|-----------|-----------|----------------------|--------------------------------------|------------------------------------------------|-----------------------------------|--|
|                                                                                 |           |          |           |           |           |          |           |           |          |          |           |          |           |          |         |           |           |          |          |           |           |           |                      | Cluster adjusted estimates n(95% CI) | Mediab (IQR) for hospital specific proportions | Range hospital specific estimates |  |
| Age in Months                                                                   |           |          |           |           |           |          |           |           |          |          |           |          |           |          |         |           |           |          |          |           |           |           |                      |                                      |                                                |                                   |  |
| Median (IQR)                                                                    | 18[11-27] | 14[8-30] | 11[6-30]  | 11[8-19]  | 14[7-24]  | 20[9-36] | 16[7-29]  | 18[11-30] | 16[9-30] | 11[6-19] | 20[12-34] | 12[9-22] | 14[7-22]  | 14[6-30] | 9[5-18] | 12[8-25]  | 16[8-28]  | 19[9-36] | 9[6-18]  | 15[10-30] | 17[10-37] | 18[11-36] |                      |                                      |                                                |                                   |  |
| Weight                                                                          |           |          |           |           |           |          |           |           |          |          |           |          |           |          |         |           |           |          |          |           |           |           |                      |                                      |                                                |                                   |  |
| Weight documented                                                               | 50 (83)   | 42 (71)  | 60 (100)  | 43 (72)   | 38 (67)   | 50 (93)  | 58 (97)   | 23 (39)   | 47 (77)  | 26 (44)  | 59 (98)   | 28 (56)  | 57 (95)   | 51 (85)  | 55 (92) | 59 (98)   | 56 (93)   | 56 (93)  | 47 (78)  | 52 (87)   | 58 (98)   | 50 (83)   |                      | 341 (79 [64 - 88])                   | 89[67-100]                                     | 0_100                             |  |
| Gender                                                                          |           |          |           |           |           |          |           |           |          |          |           |          |           |          |         |           |           |          |          |           |           |           |                      |                                      |                                                |                                   |  |
| Male                                                                            | 35 (59)   | 39 (68)  | 39 (65)   | 35 (58)   | 29 (51)   | 30 (56)  | 34 (57)   | 34 (58)   | 38 (62)  | 32 (54)  | 32 (53)   | 27 (54)  | 36 (60)   | 34 (57)  | 35 (59) | 35 (60)   | 34 (57)   | 32 (53)  | 36 (61)  | 34 (57)   | 34 (59)   | 33 (55)   |                      | 747 (59 [57 - 60])                   | 58[57-62]                                      | 53_68                             |  |
| PAR use                                                                         |           |          |           |           |           |          |           |           |          |          |           |          |           |          |         |           |           |          |          |           |           |           |                      |                                      |                                                |                                   |  |
| PAR used                                                                        | 0 (0)     | 0 (0)    | 60 (100)  | 8 (13)    | 0 (0)     | 0 (0)    | 57 (95)   | 30 (51)   | 22 (36)  | 38 (64)  | 25 (42)   | 0 (0)    | 44 (73)   | 10 (17)  | 0 (0)   | 54 (93)   | 57 (95)   | 55 (92)  | 2 (3)    | 1 (2)     | 53 (91)   | 42 (70)   |                      | 558 (43 [27 - 61])                   | 39[0-91]                                       | 0_100                             |  |
| length of stay                                                                  |           |          |           |           |           |          |           |           |          |          |           |          |           |          |         |           |           |          |          |           |           |           |                      |                                      |                                                |                                   |  |
| Median (IQR)                                                                    | 2[1-3]    | 2[1-3]   | 4[2-8]    | 3[2-5]    | 5[2-8]    | 2[2-5]   | 4[3-6]    | 3[2-4]    | 3[2-5]   | 3[2-5]   | 4[3-7]    | 3[2-4]   | 5[3-7]    | 4[3-7]   | 4[2-8]  | 4[2-10]   | 5[2-7]    | 4[2-6]   | 4[3-7]   | 3[2-6]    | 2[1-4]    | 3[2-4]    |                      |                                      | 3[2-6]                                         | 3_8                               |  |
| History documentation (max 11)                                                  |           |          |           |           |           |          |           |           |          |          |           |          |           |          |         |           |           |          |          |           |           |           |                      |                                      |                                                |                                   |  |
| Median (IQR)                                                                    | 4[3-7]    | 8[6-10]  | 11[11-11] | 11[11-11] | 11[11-11] | 6[3-8]   | 11[11-11] | 9[6-11]   | 8[5-11]  | 5[4-7]   | 7[5-11]   | 6[4-8]   | 10[4-11]  | 6[5-9]   | 4[2-5]  | 11[11-11] | 4[2-4]    | 10[8-11] | 4[3-7]   | 7[5-9]    | 11[11-11] | 11[9-11]  |                      |                                      | 9[5-11]                                        | 4_11                              |  |
| Examination documentation (max 22)                                              |           |          |           |           |           |          |           |           |          |          |           |          |           |          |         |           |           |          |          |           |           |           |                      |                                      |                                                |                                   |  |
| Median (IQR)                                                                    | 8[6-9]    | 7[6-9]   | 22[22-22] | 19[18-21] | 17[14-19] | 8[6-9]   | 21[20-21] | 12[7-16]  | 8[5-16]  | 11[4-15] | 10[6-17]  | 6[5-8]   | 17[10-19] | 8[6-12]  | 6[5-7]  | 21[21-22] | 15[13-16] | 12[9-13] | 8[6-9]   | 8[6-9]    | 22[21-22] | 19[7-21]  |                      |                                      | 11[7-19]                                       | 6_22                              |  |
| Malaria                                                                         |           |          |           |           |           |          |           |           |          |          |           |          |           |          |         |           |           |          |          |           |           |           |                      |                                      |                                                |                                   |  |
| Malaria cases                                                                   | 51        | 43       | 18        | 4         | 21        | 36       | 11        | 46        | 25       | 1        | 50        | 34       | 0         | 4        | 6       | 5         | 0         | 14       | 10       | 35        | 0         | 19        |                      |                                      | 433                                            |                                   |  |
| AVPU documented                                                                 | 34 (67)   | 37 (86)  | 18 (100)  | 4 (100)   | 18 (86)   | 31 (86)  | 11 (100)  | 38 (83)   | 13 (52)  | 1 (100)  | 36 (72)   | 13 (38)  | 0 (.)     | 3 (75)   | 4 (67)  | 5 (100)   | 0 (.)     | 13 (93)  | 8 (80)   | 30 (86)   | 0 (.)     | 13 (68)   |                      | 330 (76 [66 - 84])                   | 86[68-100]                                     | 38_100                            |  |
| Acidotic breathing documented                                                   | 0 (0)     | 2 (5)    | 17 (94)   | 4 (100)   | 19 (90)   | 0 (0)    | 11 (100)  | 23 (50)   | 8 (32)   | 1 (100)  | 22 (44)   | 0 (0)    | 0 (.)     | 0 (0)    | 0 (0)   | 5 (100)   | 0 (.)     | 2 (14)   | 0 (0)    | 0 (0)     | 0 (.)     | 15 (79)   |                      | 129 (30 [15 - 50])                   | 32[0-94]                                       | 0_100                             |  |
| Pallor documented                                                               | 50 (98)   | 41 (95)  | 18 (100)  | 3 (75)    | 21 (100)  | 35 (97)  | 11 (100)  | 45 (98)   | 25 (100) | 1 (100)  | 47 (94)   | 30 (88)  | 0 (.)     | 4 (100)  | 6 (100) | 5 (100)   | 0 (.)     | 14 (100) | 7 (70)   | 34 (97)   | 0 (.)     | 17 (89)   |                      | 414 (96 [93 - 97])                   | 98[94-100]                                     | 70_100                            |  |
| Fever documented                                                                | 48 (94)   | 43 (100) | 18 (100)  | 4 (100)   | 21 (100)  | 35 (97)  | 11 (100)  | 46 (100)  | 23 (92)  | 1 (100)  | 48 (96)   | 31 (91)  | 0 (.)     | 4 (100)  | 2 (33)  | 5 (100)   | 0 (.)     | 14 (100) | 8 (80)   | 33 (94)   | 0 (.)     | 18 (95)   |                      | 413 (95 [92 - 97])                   | 100[94-100]                                    | 33_100                            |  |
| Malaria process indicators                                                      |           |          |           |           |           |          |           |           |          |          |           |          |           |          |         |           |           |          |          |           |           |           |                      |                                      |                                                |                                   |  |
| Tested for malaria                                                              | 49 (96)   | 38 (88)  | 18 (100)  | 4 (100)   | 16 (76)   | 35 (97)  | 11 (100)  | 44 (96)   | 20 (80)  | 1 (100)  | 47 (94)   | 29 (85)  | 0 (.)     | 4 (100)  | 2 (33)  | 5 (100)   | 0 (.)     | 12 (86)  | 8 (80)   | 34 (97)   | 0 (.)     | 19 (100)  |                      | 396 (91 [87 - 95])                   | 96[85-100]                                     | 33_100                            |  |
| Lab confirmed malaria cases                                                     | 19 (37)   | 32 (74)  | 14 (78)   | 1 (25)    | 13 (62)   | 13 (36)  | 10 (91)   | 35 (76)   | 7 (28)   | 0 (0)    | 9 (18)    | 4 (12)   | 0 (.)     | 4 (100)  | 0 (0)   | 4 (80)    | 0 (.)     | 4 (29)   | 2 (20)   | 26 (74)   | 0 (.)     | 11 (58)   |                      | 208 (48 [33 - 63])                   | 37[20-76]                                      | 0_100                             |  |
| Malaria cases with Quinine loading dose                                         | 44 (86)   | 41 (95)  | 13 (72)   | 1 (25)    | 16 (76)   | 30 (83)  | 11 (100)  | 42 (91)   | 14 (56)  | 0 (0)    | 39 (78)   | 20 (59)  | 0 (.)     | 4 (100)  | 1 (17)  | 1 (20)    | 0 (.)     | 9 (64)   | 3 (30)   | 15 (43)   | 0 (.)     | 16 (84)   |                      | 320 (74 [62 - 83])                   | 72[30-86]                                      | 0_100                             |  |
| Of the tested cases number with slide positive results                          | 19 (66)   | 32 (91)  | 14 (82)   | 1 (33)    | 13 (87)   | 13 (45)  | 10 (91)   | 35 (95)   | 7 (58)   | 0 (0)    | 9 (35)    | 4 (50)   | 0 (.)     | 4 (100)  | 0 (.)   | 4 (80)    | 0 (.)     | 4 (60)   | 2 (33)   | 26 (87)   | 0 (.)     | 11 (65)   |                      | 208 (72 [57 - 83])                   | 73[45-87]                                      | 0_100                             |  |
| Of the tested cases number prescribed quinine loading dose with negative result | 7 (16)    | 1 (2)    | 2 (15)    | 0 (0)     | 1 (6)     | 11 (37)  | 1 (9)     | 1 (2)     | 3 (21)   | 0 (.)    | 13 (33)   | 2 (10)   | 0 (.)     | 0 (0)    | 0 (0)   | 0 (0)     | 0 (.)     | 0 (0)    | 1 (33)   | 0 (0)     | 0 (.)     | 5 (31)    |                      | 48 (15 [ 8 - 26])                    | 7.5[0 - 21]                                    | 0_37                              |  |
| Malaria cases with correct Quinine dose mg/kg                                   | 35 (95)   | 28 (97)  | 12 (100)  | 0 (.)     | 10 (83)   | 24 (89)  | 7 (100)   | 17 (94)   | 12 (100) | 0 (.)    | 40 (98)   | 11 (85)  | 0 (.)     | 4 (100)  | 1 (100) | 1 (100)   | 0 (.)     | 9 (100)  | 2 (100)  | 16 (100)  | 0 (.)     | 14 (100)  |                      | 243 (95 [92 - 97])                   | 100[95-100]                                    | 83_100                            |  |
| Pneumonia process indicators                                                    |           |          |           |           |           |          |           |           |          |          |           |          |           |          |         |           |           |          |          |           |           |           |                      |                                      |                                                |                                   |  |
| Pneumonia cases                                                                 | 15        | 16       | 32        | 37        | 10        | 19       | 28        | 13        | 20       | 27       | 34        | 28       | 37        | 20       | 38      | 39        | 37        | 38       | 35       | 16        | 33        | 25        |                      |                                      | 597                                            |                                   |  |
| Cough documented                                                                | 14 (93)   | 16 (100) | 32 (100)  | 37 (100)  | 10 (100)  | 18 (95)  | 28 (100)  | 11 (85)   | 19 (95)  | 22 (81)  | 33 (97)   | 27 (96)  | 31 (84)   | 19 (95)  | 32 (84) | 39 (100)  | 29 (78)   | 38 (100) | 31 (89)  | 16 (100)  | 33 (100)  | 25 (100)  |                      | 560 (94 [89 - 97])                   | 97[89-100]                                     | 78_100                            |  |
| Respiratory rate documented                                                     | 13 (87)   | 10 (63)  | 32 (100)  | 36 (97)   | 7 (70)    | 14 (74)  | 23 (82)   | 3 (23)    | 10 (50)  | 6 (22)   | 17 (50)   | 20 (71)  | 20 (54)   | 14 (70)  | 3 (8)   | 34 (87)   | 21 (57)   | 35 (92)  | 13 (37)  | 14 (88)   | 33 (100)  | 13 (52)   |                      | 391 (65 [51 - 78])                   | 70[50-87]                                      | 8_100                             |  |
| Lower chest wall in-drawing documented                                          | 14 (93)   | 3 (19)   | 32 (100)  | 37 (100)  | 10 (100)  | 7 (37)   | 28 (100)  | 10 (77)   | 16 (80)  | 16 (59)  | 29 (85)   | 15 (54)  | 32 (86)   | 10 (50)  | 23 (61) | 39 (100)  | 35 (95)   | 31 (82)  | 28 (80)  | 11 (69)   | 33 (100)  | 22 (88)   |                      | 481 (81 [70 - 88])                   | 84[61-100]                                     | 47_100                            |  |
| Central cyanosis documented                                                     | 12 (80)   | 14 (88)  | 32 (100)  | 36 (97)   | 10 (100)  | 9 (47)   | 28 (100)  | 12 (92)   | 13 (65)  | 21 (78)  | 25 (74)   | 21 (75)  | 31 (84)   | 16 (80)  | 31 (82) | 39 (100)  | 35 (95)   | 37 (97)  | 34 (97)  | 14 (88)   | 33 (100)  | 22 (88)   |                      | 525 (88 [81 - 93])                   | 88[80-97]                                      | 47_100                            |  |
| AVPU documented                                                                 | 10 (67)   | 15 (94)  | 32 (100)  | 37 (100)  | 8 (80)    | 14 (74)  | 28 (100)  | 11 (85)   | 9 (45)   | 18 (67)  | 27 (79)   | 8 (29)   | 32 (86)   | 14 (70)  | 17 (45) | 39 (100)  | 34 (92)   | 35 (92)  | 30 (86)  | 15 (94)   | 33 (100)  | 16 (64)   |                      | 482 (81 [69 - 89])                   | 86[67-94]                                      | 29_100                            |  |
| Grunting documented                                                             | 9 (60)    | 1 (6)    | 32 (100)  | 37 (100)  | 10 (100)  | 2 (11)   | 28 (100)  | 8 (62)    | 12 (60)  | 12 (44)  | 17 (50)   | 4 (14)   | 26 (70)   | 5 (25)   | 2 (5)   | 39 (100)  | 35 (95)   | 12 (32)  | 17 (49)  | 4 (25)    | 33 (100)  | 21 (84)   |                      | 366 (61 [44 - 76])                   | 60[25-100]                                     | 5_100                             |  |
| Ability to drink documented                                                     | 2 (13)    | 0 (0)    | 32 (100)  | 37 (100)  | 9 (90)    | 0 (0)    | 28 (100)  | 8 (62)    | 5 (25)   | 17 (63)  | 13 (38)   | 8 (29)   | 30 (81)   | 3 (15)   | 5 (13)  | 39 (100)  | 31 (84)   | 13 (34)  | 5 (14)   | 1 (6)     | 33 (100)  | 20 (80)   |                      | 339 (57 [39 - 73])                   | 50[14-90]                                      | 0_100                             |  |
| Crystalline penicillin dose accuracy                                            | 10 (100)  | 10 (83)  | 23 (85)   | 23 (100)  | 6 (100)   | 12 (92)  | 22 (100)  | 1 (100)   | 13 (100) | 10 (91)  | 28 (88)   | 6 (100)  | 31 (97)   | 14 (93)  | 24 (77) | 30 (91)   | 28 (90)   | 29 (94)  | 22 (96)  | 12 (100)  | 21 (100)  | 20 (87)   |                      | 395 (92 [88 - 95])                   | 95[90-100]                                     | 77_100                            |  |
| Gentamicin dose accuracy                                                        | 4 (100)   | 8 (80)   | 18 (72)   | 8 (100)   | 5 (100)   | 7 (88)   | 17 (89)   | 0 (.)     | 12 (100) | 5 (83)   | 22 (100)  | 4 (67)   | 13 (87)   | 12 (86)  | 13 (93) | 18 (100)  | 14 (74)   | 25 (89)  | 4 (100)  | 7 (100)   | 4 (100)   | 12 (92)   |                      | 232 (89 [82 - 93])                   | 92[86-100]                                     | 67_100                            |  |
| Correct antibiotic treatment as per severity classification                     | 11 (73)   | 9 (56)   | 23 (72)   | 28 (76)   | 1 (10)    | 10 (53)  | 9 (32)    | 2 (15)    | 14 (70)  | 17 (63)  | 11 (32)   | 12 (43)  | 30 (81)   | 12 (60)  | 25 (66) | 28 (72)   | 31 (84)   | 18 (47)  | 14 (40)  | 12 (75)   | 22 (67)   | 12 (48)   |                      | 351 (59 [50 - 67])                   | 62[43-72]                                      | 10_84                             |  |
| Dehydration                                                                     |           |          |           |           |           |          |           |           |          |          |           |          |           |          |         |           |           |          |          |           |           |           |                      |                                      |                                                |                                   |  |
| Dehydration cases                                                               | 4         | 6        | 9         | 8         | 12        | 9        | 13        | 16        | 23       | 21       | 11        | 7        | 21        | 27       | 7       | 5         | 13        | 11       | 17       | 10        | 7         | 14        |                      |                                      | 271                                            |                                   |  |
| Sunken eyes documented                                                          | 2 (50)    | 0 (0)    | 9 (100)   | 8 (100)   | 12 (100)  | 3 (33)   | 13 (100)  | 3 (19)    | 6 (26)   | 2 (10)   | 9 (82)    | 2 (29)   | 0 (0)     | 12 (44)  | 3 (43)  | 5 (100)   | 0 (0)     | 3 (27)   | 3 (18)   | 3 (30)    | 7 (100)   | 7 (50)    |                      | 112 (41 [27 - 58])                   | 38[19-100]                                     | 0_100                             |  |
| Skin pinch documented                                                           | 2 (50)    | 0 (0)    | 7 (78)    | 7 (88)    | 6 (50)    | 4 (44)   | 13 (100)  | 9 (56)    | 10 (43)  | 4 (19)   | 5 (45)    | 0 (0)    | 14 (67)   | 10 (37)  | 1 (14)  | 4 (80)    | 4 (31)    | 5 (45)   | 7 (41)   | 3 (30)    | 7 (100)   | 7 (50)    |                      | 129 (48 [37 - 58])                   | 45[31-67]                                      | 0_100                             |  |
| zinc prescribed                                                                 | 3 (75)    | 3 (50)   | 5 (56)    | 6 (75)    | 6 (50)    | 6 (67)   | 12 (92)   | 5 (31)    | 19 (83)  | 14 (67)  | 6 (55)    | 2 (29)   | 19 (90)   | 22 (81)  | 6 (86)  | 3 (60)    | 7 (54)    | 5 (45)   | 9 (53)   | 8 (80)    | 4 (57)    | 9 (64)    |                      | 179 (66 [57 - 74])                   | 62[53-80]                                      | 29_92                             |  |
| Dehydration cases with IV fluids prescribed                                     | 3 (75)    | 5 (83)   | 3 (33)    | 7 (88)    | 11 (92)   | 7 (78)   | 13 (100)  | 11 (69)   | 19 (83)  | 12 (57)  | 9 (82)    | 16 (76)  | 26 (96)   | 7 (100)  | 5 (100) | 3 (32)    | 9 (82)    | 6 (35)   | 10 (100) | 7 (100)   | 8 (57)    |           |                      | 204 (75 [63 - 85])                   | 82[69-100]                                     | 23_100                            |  |
| Severe dehydration cases with IV fluids                                         | 2 (67)    | 1 (20)   | 1 (33)    | 0 (0)     | 6 (55)    | 2 (29)   | 8 (62)    | 4 (36)    | 6 (32)   | 4 (33)   | 4 (44)    | 1 (14)   | 15 (94)   | 14 (54)  | 5 (71)  | 3 (60)    | 0 (0)     | 2 (22)   |          |           |           |           |                      |                                      |                                                |                                   |  |
